# Supplementary material
Source: Springer Nature journal article supplement (https://www.springermedizin.de/resource/supplementary/12889_2013_6748_MOESM2_ESM.pdf/9498898)
Supplement: MOESM2 [file 9498898]

# 25 RURAL KEBELES IN DEBUB BENCH DISTRICT

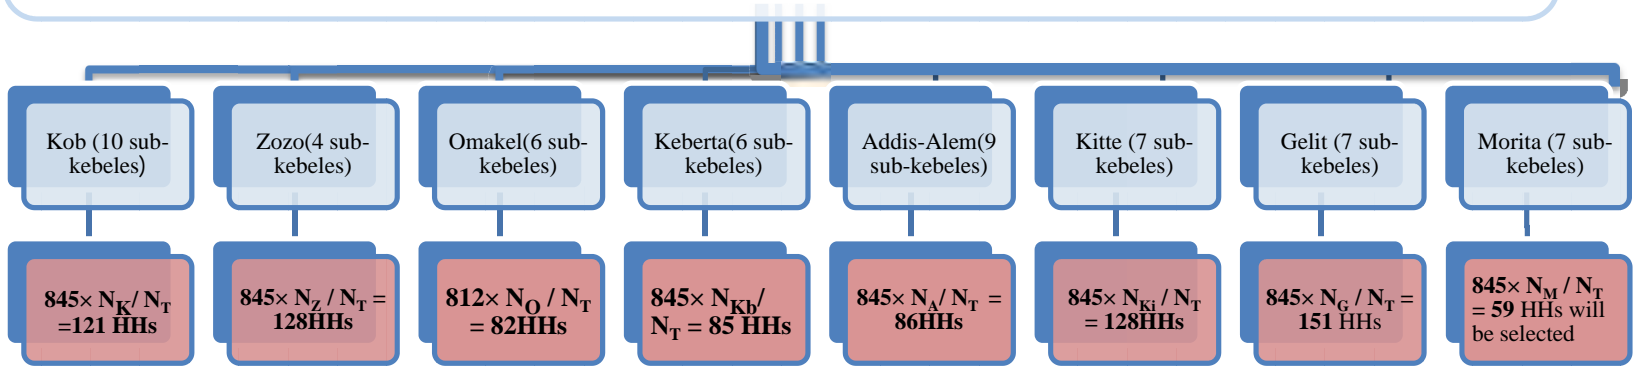

Where: -  $N_K$ =number of total households in Kob=1244  
 $N_Z$ =number of total households in Zozo=1313  
 $N_O$ =number of total households in Omakel=875  
 $N_{Kb}$ =number of total households in Keberta =892  
 $N_A$ =number of total households in A/Alem= 901

$N_{Ki}$ =number of total households in Kitte= 1313  
 $N_G$ =number of total households in Gelit=1546  
 $N_M$ =number of total households in Morita= 594  
 HHs= households to be selected at systematic random sampling within the selected kebeles  
 $N_T = N_K + N_Z + N_O + N_{Kb} + N_A + N_{Ki} + N_G + N_M = 8678$ .
